# Supplementary material
Source: MDPI journal article supplement (https://www.mdpi.com/2071-1050/7/3/3430)
Supplement: s1 [file s1]

## Supplementary Materials

**Table S1.** Daily dietary energy consumption per capita (2008) [1]. Needed country's total consumption equals US current consumption per capita times population of the country.

|       | <b>Daily Dietary Energy<br/>Consumption per Capita<br/>(2008) <i>kcal</i></b> | <b>Total Daily Dietary<br/>Energy Consumption<br/>(2008) <i>bill. kcal</i></b> | <b>Total Daily Dietary Energy<br/>Consumption Needed to Reach<br/>US Level (2008) <i>bill. kcal</i></b> |
|-------|-------------------------------------------------------------------------------|--------------------------------------------------------------------------------|---------------------------------------------------------------------------------------------------------|
| US    | 3750                                                                          | 1177.2                                                                         | 1177.2                                                                                                  |
| EU-27 | 3540                                                                          | 1782.4                                                                         | 1888.1                                                                                                  |
| China | 2990                                                                          | 4019.0                                                                         | 5040.5                                                                                                  |
| India | 2360                                                                          | 2929.9                                                                         | 4655.6                                                                                                  |
| World | 2800                                                                          | 19,810.0                                                                       | 26,531.3                                                                                                |

**Table S2.** Annual freshwater withdrawals (2011) [2]. Needed country's total consumption equals US current consumption per capita times population of the country.

|       | <b>Annual Freshwater<br/>Consumption per<br/>Capita (2011) <i>m</i><sup>3</sup></b> | <b>Total Annual<br/>Freshwater<br/>Consumption (2011) <i>km</i><sup>3</sup></b> | <b>Total Annual Freshwater<br/>Consumption Needed to<br/>Reach US level (2011) <i>km</i><sup>3</sup></b> |
|-------|-------------------------------------------------------------------------------------|---------------------------------------------------------------------------------|----------------------------------------------------------------------------------------------------------|
| US    | 1524.0                                                                              | 478.4                                                                           | 478.4                                                                                                    |
| EU-27 | 472.1                                                                               | 237.7                                                                           | 767.3                                                                                                    |
| China | 412.2                                                                               | 554.1                                                                           | 2048.4                                                                                                   |
| India | 613.0                                                                               | 761.0                                                                           | 1892.0                                                                                                   |
| World | 550.4                                                                               | 3893.8                                                                          | 10,782.2                                                                                                 |

**Table S3.** GDP total and per capita (2011) [3]. Needed country's total GDP equals US current GDP per capita times population of the country.

|       | <b>GDP per Capita<br/>(2012) <i>USD</i></b> | <b>Total GDP (2012)<br/><i>Trill. USD</i></b> | <b>Total GDP Needed to Reach<br/>US Level (2012) <i>Trill. USD</i></b> |
|-------|---------------------------------------------|-----------------------------------------------|------------------------------------------------------------------------|
| US    | 47,755.1                                    | 15.0                                          | 15.0                                                                   |
| EU-27 | 34,903.7                                    | 17.6                                          | 24.2                                                                   |
| China | 5444.4                                      | 7.3                                           | 64.7                                                                   |
| India | 1487.7                                      | 1.8                                           | 59.7                                                                   |
| World | 9891.3                                      | 70.0                                          | 339.3                                                                  |

**Table S4.** GDP (PPP) total and per capita (2011) [4]. GDP PPP is gross domestic product converted to international dollars using purchasing power parity rates. An international dollar has the same purchasing power over GDP as the US dollar has in the United States. Needed country's total GDP PPP equals US current GDP PPP per capita times population of the country.

|       | <b>GDP (PPP) per Capita<br/>(2011) <i>International \$</i></b> | <b>Total GDP (PPP) (2011)<br/><i>Trill. International \$</i></b> | <b>Total GDP (PPP) Needed<br/>to Reach US Level (2012)<br/><i>Trill. International \$</i></b> |
|-------|----------------------------------------------------------------|------------------------------------------------------------------|-----------------------------------------------------------------------------------------------|
| US    | 47,756.1                                                       | 15.0                                                             | 15.0                                                                                          |
| EU-27 | 32,655.2                                                       | 16.4                                                             | 24.0                                                                                          |
| China | 8400.2                                                         | 11.3                                                             | 64.2                                                                                          |
| India | 3627.1                                                         | 4.5                                                              | 59.3                                                                                          |
| World | 11,428.3                                                       | 80.9                                                             | 337.9                                                                                         |

## References

1. Food and Agriculture Organization of the United Nations. FAO Statistics Division. Available online: [http://www.fao.org/fileadmin/templates/ess/documents/food\\_security\\_statistics/FoodConsumptionNutrients\\_en.xls](http://www.fao.org/fileadmin/templates/ess/documents/food_security_statistics/FoodConsumptionNutrients_en.xls) (accessed on 4 October 2014).
2. Food and Agriculture Organization. Aquastat Data (on World Bank Web-Site). Available online: <http://data.worldbank.org/indicator/ER.H2O.FWTL.K3/countries/1W-EU-US-CN-IN?display=graph> (accessed on 4 October 2014).
3. World Bank National Accounts Data, and OECD National Accounts Data Files. Available online: <http://data.worldbank.org/indicator/NY.GDP.MKTP.CD/countries/1W-EU-US-CN-IN?display=graph> (accessed on 4 October 2014).
4. World Bank. International Comparison Program Database. Available online: <http://data.worldbank.org/indicator/NY.GDP.MKTP.PP.CD/countries/US-EU-CN-IN-1W?display=graph> (accessed on 4 October 2014).

© 2015 by the authors; licensee MDPI, Basel, Switzerland. This article is an open access article distributed under the terms and conditions of the Creative Commons Attribution license (<http://creativecommons.org/licenses/by/4.0/>).
